# Supplementary material
Source: PubMed Central journal article supplement (PMC3465465)
Supplement: NIHMS397889-supplement-1.pdf [file NIHMS397889-supplement-1.pdf]

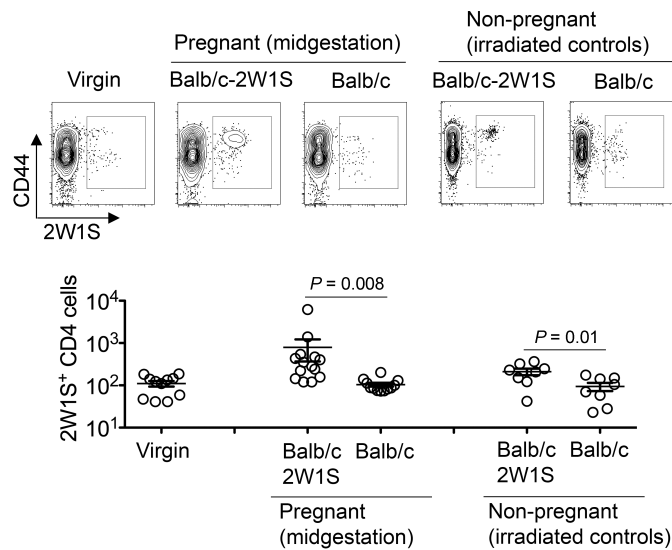

**Supplementary Figure 1. Expansion of maternal CD4 cells with fetal-2W1S-specificity is specific to mating with 2W1S-expressing males.** Representative FACS plots (top) and cumulative data illustrating the accumulation of 2W1S<sup>+</sup> CD4 cells in virgin, non-irradiated B6 females midgestation (E11.5) after mating with either 2W1S-expressing or control Balb/c males, and irradiated (100 rads) non-pregnant B6 females after continuous mating with 2W1S-expressing or control Balb/c males. These data are representative of two independent experiments each with similar results. Bar, mean  $\pm$  one standard error.

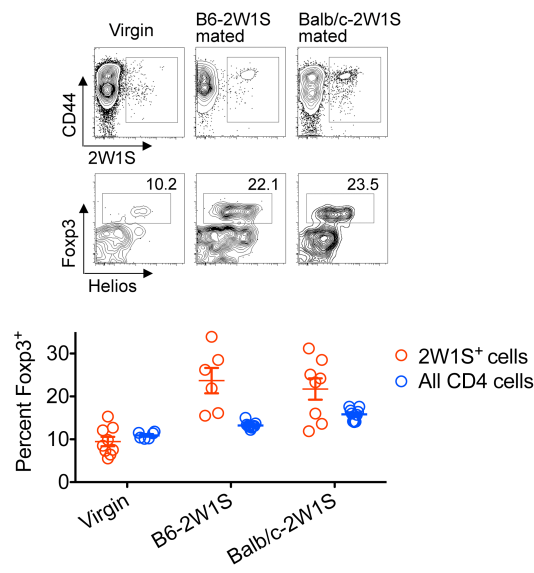

**Supplementary Figure 2. Expansion of maternal CD4 and Foxp3<sup>+</sup> regulatory cells with fetal-2W1S-specificity in allogeneic compared with syngeneic pregnancy.** Representative FACS plots (top) and cumulative data illustrating the accumulation of 2W1S<sup>+</sup>Foxp3<sup>+</sup> (red) or total Foxp3<sup>+</sup> CD4 cells (blue) in virgin or pregnant midgestation (E11.5) B6 mice impregnated by 2W1S-expressing B6 or 2W1S-expressing Balb/c males. These data are representative of two independent experiments each with similar results. Bar, mean  $\pm$  one standard error.

|        | All 2W1S <sup>+</sup> | Fold-increase | P valve | 2W1S <sup>+</sup> Foxp3 <sup>+</sup> | Fold-increase | P valve | 2W1S <sup>+</sup> Foxp3 <sup>-</sup> | Fold-increase | P valve |
|--------|-----------------------|---------------|---------|--------------------------------------|---------------|---------|--------------------------------------|---------------|---------|
| Virgin | 110 ± 16              |               |         | 10 ± 2                               |               |         | 100 ± 17                             |               |         |
| E11.5  | 791 ± 424             | 7.2           | 0.0011  | 408 ± 356                            | 40.8          | 0.0001  | 383 ± 103                            | 3.8           | 0.0024  |
| E18.5  | 1334 ± 380            | 12.1          | 0.0058  | 720 ± 236                            | 72.0          | 0.0001  | 680 ± 162                            | 6.8           | 0.0027  |
| PP2    | 2096 ± 677            | 19.0          | 0.0011  | 1346 ± 499                           | 134.6         | 0.0006  | 741 ± 247                            | 7.4           | 0.0111  |
| PP14   | 995 ± 212             | 9.0           | 0.0011  | 234 ± 59                             | 23.4          | 0.0002  | 801 ± 171                            | 8.0           | 0.0026  |
| PP30   | 1975 ± 1085           | 18.0          | 0.0003  | 259 ± 97                             | 25.9          | 0.0003  | 1716 ± 1052                          | 17.2          | 0.0003  |
| PP100  | 338 ± 76              | 3.1           | 0.0042  | 53 ± 10                              | 5.3           | 0.0011  | 286 ± 70                             | 2.9           | 0.0077  |

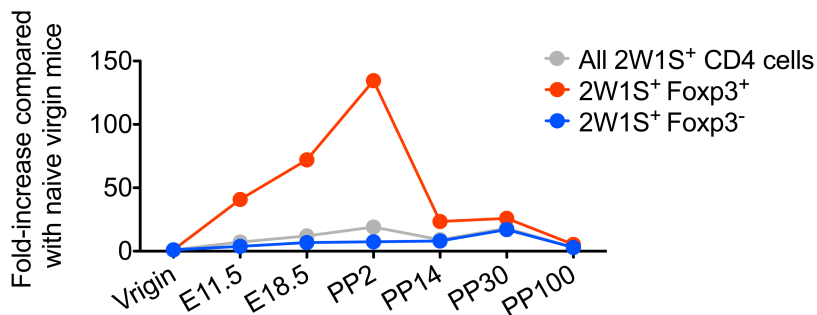

**Supplementary Figure 3. Accumulation of maternal Foxp3<sup>+</sup> regulatory and Foxp3<sup>-</sup> CD4 cells with fetal-2W1S-specificity throughout gestation and following parturition.** Table (top) illustrating number and fold-expansion of CD4 cells with fetal-2W1S-specificity at each pregnancy (E) or postpartum (PP) time point compared with virgin controls, and composite graph (bottom) illustrating the accumulation of all fetal-2W1S-specific CD4 cells (gray), 2W1S-specific Foxp3<sup>+</sup> (red), and 2W1S-specific Foxp3<sup>-</sup> (blue) CD4 cell subsets.

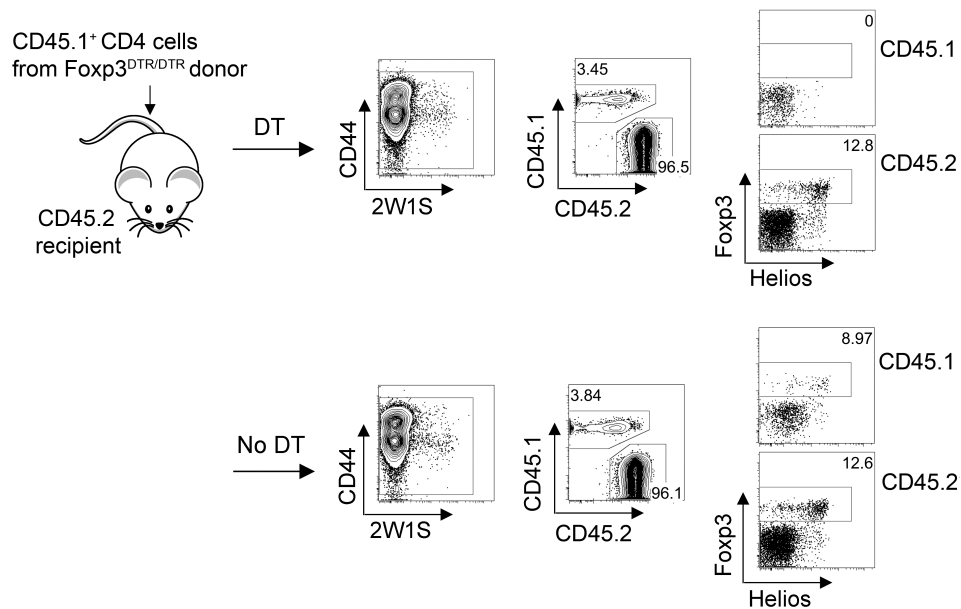

**Supplementary Figure 4. Foxp3<sup>+</sup> Tregs are efficiently eliminated among Foxp3<sup>DTR/DTR</sup> donor cells in Foxp3<sup>WT/WT</sup> recipient mice.** Representative FACS plots illustrating the percent Foxp3<sup>+</sup> among each subset of CD4 cells twelve days after adoptive transfer. Purified CD4 cells from CD45.1<sup>+</sup> Foxp3<sup>DTR/DTR</sup> mice were adoptively transferred into naïve CD45.2<sup>+</sup> recipients that were administered diphtheria toxin (two 0.5  $\mu$ g doses 8 hours apart) (top) or no DT controls (bottom).

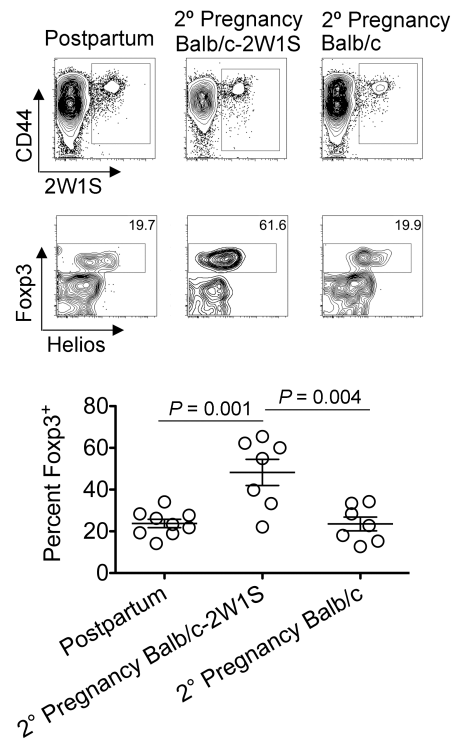

**Supplementary Figure 5. Accelerated expansion of maternal Foxp3<sup>+</sup> CD4 cells with fetal-2W1S-specificity occurs in an antigen-specific fashion during secondary pregnancy.** Representative FACS plots (top) and composite data (bottom) illustrating percent Foxp3<sup>+</sup> among 2W1S<sup>+</sup> CD4 cells after primary pregnancy by Balb/c-2W1S males (postpartum), or midgestation (E11.5) during secondary pregnancy by Balb/c-2W1S or Balb/c control males. These data are representative of two independent experiments each with similar results. Bar, mean ± one standard error.

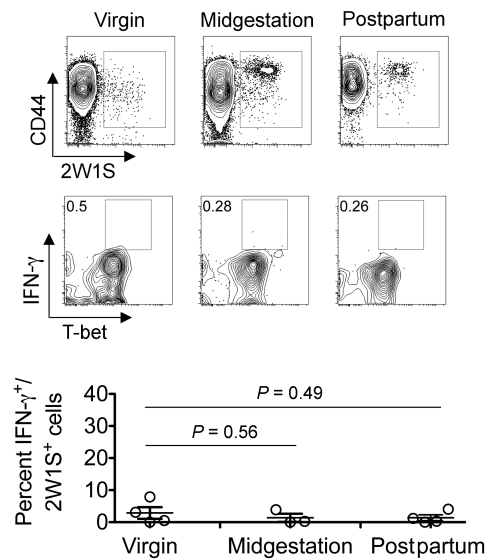

**Supplementary Figure 6. Maternal CD4 cells with 2W1S-specificity in virgin, pregnant, and postpartum mice do not produce IFN- $\gamma$  after *ex vivo* stimulation.** Representative FACS plots (top) and cumulative data illustrating percent IFN- $\gamma$  producing 2W1S<sup>+</sup> CD4 cells after stimulation with PMA/Ionomycin for five hours in cultures supplemented with brefeldin A. These data are representative of two independent experiments each with similar results. Bar, mean  $\pm$  one standard error.

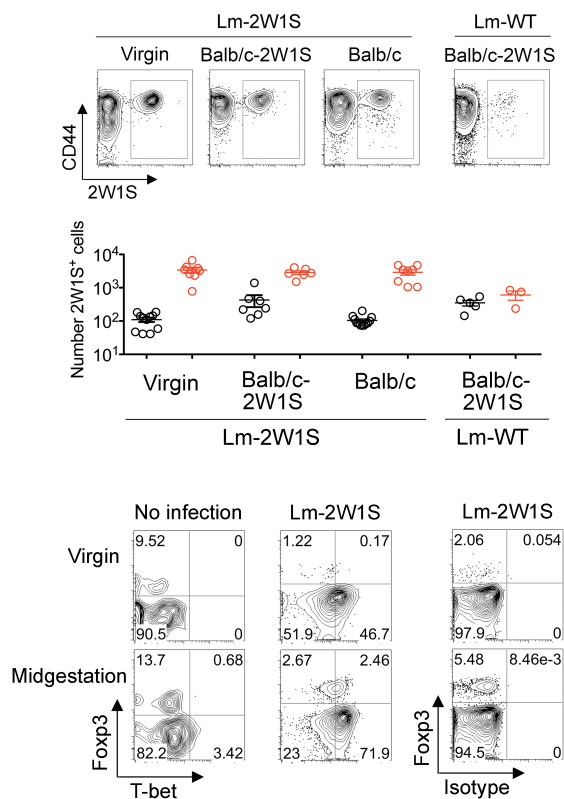

**Supplementary Figure 7. Lm-2W1S stimulates expansion and T-bet expression among CD4 cells with 2W1S-specificity in virgin and pregnant mice.** Representative FACS plots (top) and cumulative data illustrating number of 2W1S<sup>+</sup> CD4 cells before (black) or five days after Lm-2W1S or non-recombinant Lm inoculation (red) for naïve virgin or pregnant B6 mice midgestation after mating with 2W1S-expressing or control Balb/c males (top). T-bet expression, compared with isotype staining controls, among Foxp3<sup>+</sup> 2W1S<sup>+</sup> and Foxp3<sup>-</sup> 2W1S<sup>+</sup> CD4 cells before or day 5 after Lm-2W1S inoculation in virgin or pregnant midgestation B6 mice impregnated by Balb/c-2W1S males (bottom). Bar, mean ± one standard error.

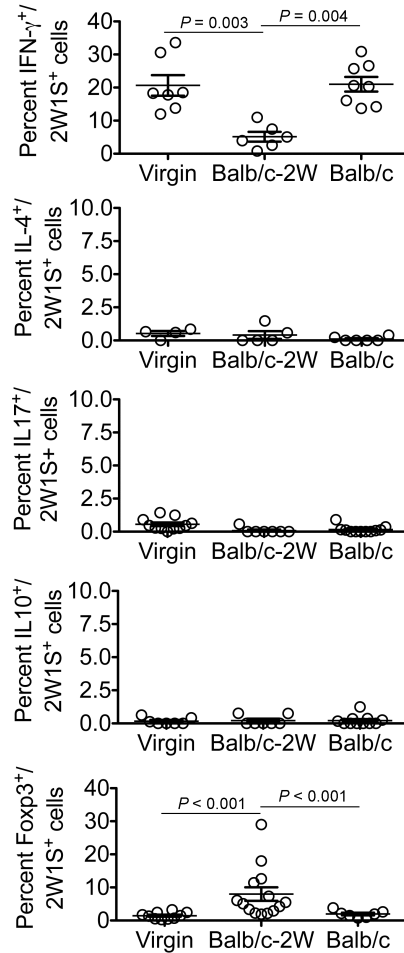

**Supplementary Figure 8. Cytokine production and Foxp3 expression among CD4 cells with fetal-2W1S-specificity after Lm-2W1S inoculation in virgin and pregnant mice.** Percent IFN- $\gamma$ , IL-4, IL-17A, IL-10 and Foxp3 positive among 2W1S<sup>+</sup> CD4 cells in virgin or pregnant midgestation B6 females impregnated by Balb/c-2W1S or Balb/c males 5 days after Lm-2W1S inoculation. These data are representative of three independent experiments each with similar results. Bar, mean  $\pm$  one standard error.



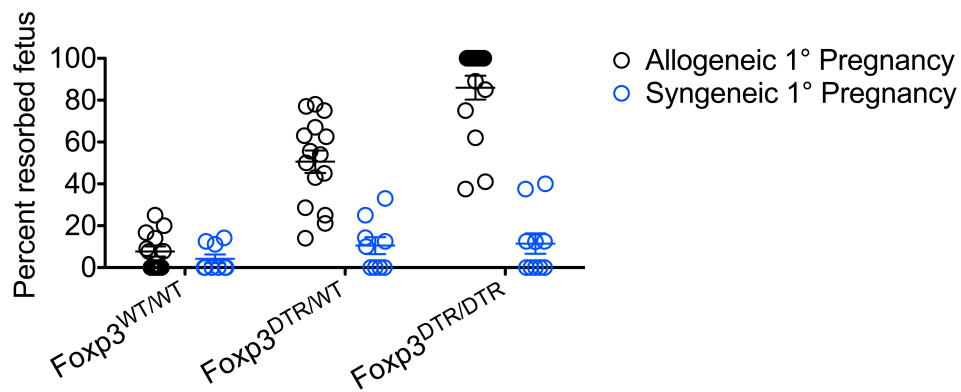

**Supplementary Figure 9. Fetal resorption triggered by maternal Treg ablation is sharply reduced in syngeneic compared with allogeneic pregnancy.** Percent fetal resorption in allogeneic (black circles, impregnated by Balb/c males) or syngeneic (blue circles, impregnated by B6 males) for  $Foxp3^{WT/WT}$ ,  $Foxp3^{DTR/WT}$ , or  $Foxp3^{DTR/DTR}$  females each on the B6 background five days after the initiation of DT beginning midgestation. These data are representative of two independent experiments each with similar results. Bar, mean  $\pm$  one standard error.

**Model 1, Non-specific maternal Treg expansion**

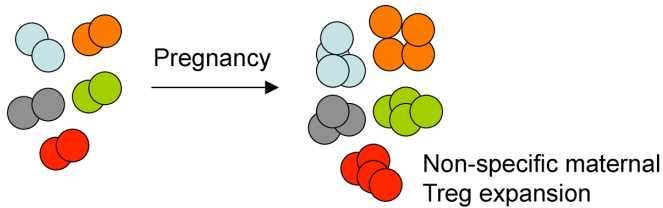

**Model 2, Selective expansion of maternal Tregs with fetal-specificity**

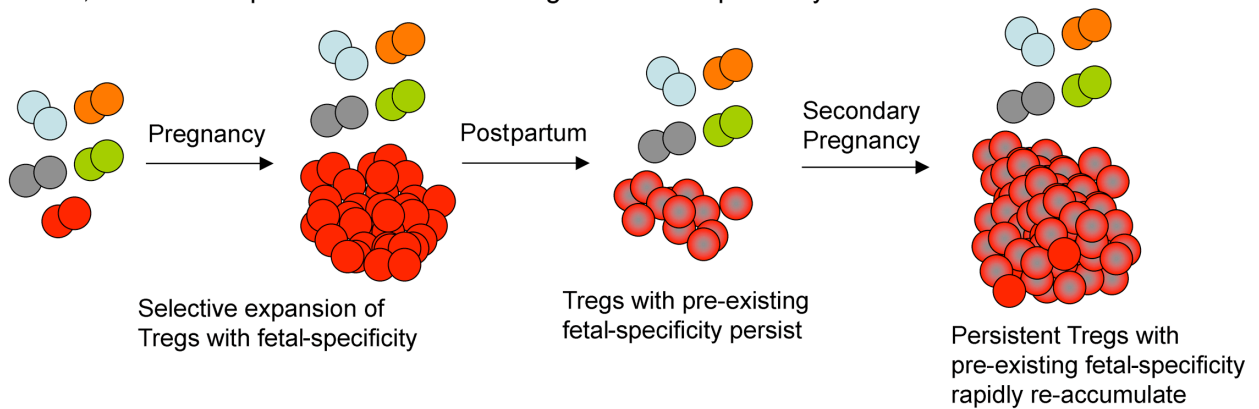

**Supplementary Figure 10. Models comparing maternal regulatory CD4 cell accumulation.**

In model 1 (top), pregnancy stimulates non-specific expansion of maternal  $\text{Foxp3}^+$  regulatory T cells before investigation using antigen-specific tools. In model 2 (bottom), maternal regulatory T cells with fetal-antigen specificity selectively expand and accumulate during pregnancy. This model is supported by data presented in this paper where maternal regulatory CD4 cells with specificity for a single peptide antigen expressed by the developing fetus are found to expand greater than 100-fold, while  $\text{Foxp3}$ -expression among bulk maternal CD4 cells accumulate less than 2-fold. Furthermore, we show pregnancy-induced maternal regulatory T cells with fetal specificity are pheno-typically distinct, persist after delivery, and rapidly re-expand and provide protection from fetal resorption during secondary pregnancy.
